# Supplementary material for: Access to and Engagement in Substance Use Disorder Treatment Over Time
Source: Atypon-hosted journal article supplement (doi:10.1176/appi.ps.201800461), 2020-02-24
Supplement: appi.ps.201800461.ds001.pdf [file appi.ps.201800461.ds001.pdf]

Table 1. 10th and 90th Percentiles of the Substance Use Disorder Measure Performance in 2010 and 2016. (Online Supplement)

|                       |             | <b>Commercial Plan</b> |                     |                                              | <b>Medicaid Managed Care Plan</b> |                     |                                              |
|-----------------------|-------------|------------------------|---------------------|----------------------------------------------|-----------------------------------|---------------------|----------------------------------------------|
| <b>Measure</b>        | <b>Year</b> | <b>10th<br/>(%)</b>    | <b>90th<br/>(%)</b> | <b>Difference<br/>(Percentage<br/>Point)</b> | <b>10th<br/>(%)</b>               | <b>90th<br/>(%)</b> | <b>Difference<br/>(Percentage<br/>Point)</b> |
| <b>Identification</b> | 2010        | 0.7                    | 1.5                 | 0.8                                          | 1.2                               | 5.7                 | 4.5                                          |
|                       | 2016        | 1.1                    | 2.0                 | 0.9                                          | 1.7                               | 12.4                | 10.7                                         |
| <b>Initiation</b>     | 2010        | 33.0                   | 50.3                | 17.3                                         | 30.0                              | 60.7                | 30.7                                         |
|                       | 2016        | 27.5                   | 40.6                | 13.1                                         | 32.0                              | 50.0                | 18.0                                         |
| <b>Engagement</b>     | 2010        | 9.5                    | 22.1                | 12.6                                         | 2.0                               | 25.9                | 23.9                                         |
|                       | 2016        | 6.2                    | 17.3                | 11.1                                         | 4.8                               | 21.3                | 16.5                                         |

Data source: National Committee for Quality Assurance.
